# Supplementary material for: Comparing Interviewer-Administered and Web-Based Food Frequency Questionnaires to Predict Energy Requirements in Adults
Source: PubMed Central journal article supplement (PMC6165380; doi:10.3390/nu10091292), 2018-09-12
Supplement: nutrients-10-01292-s001.pdf [file nutrients-10-01292-s001.pdf]

**Supplemental table****Table S1.** Anthropometric characteristics before and after controlled feeding phases of 4 to 6 weeks in men and women

|                                          | Controlled feeding |              | Difference (95%CI) | <i>P</i> * |
|------------------------------------------|--------------------|--------------|--------------------|------------|
|                                          | Pre                | Post         |                    |            |
| <b>Men (n=159)</b>                       |                    |              |                    |            |
| Body weight, <i>kg</i>                   | 89.1 ± 15.6        | 88.7 ± 15.4  | -0.4 (-0.6, -0.3)  | <0.0001    |
| Body mass index, <i>kg/m<sup>2</sup></i> | 29.2 ± 5.0         | 29.0 ± 4.9   | -0.1 (-0.2, -0.1)  | <0.0001    |
| Waist circumference, <i>cm</i>           | 101.0 ± 14.8       | 100.5 ± 14.7 | -0.5 (-0.8, -0.2)  | 0.0005     |
| <b>Women (n=168)</b>                     |                    |              |                    |            |
| Body weight, <i>kg</i>                   | 71.7 ± 13.7        | 71.1 ± 13.6  | -0.6 (-0.8, -0.5)  | <0.0001    |
| Body mass index, <i>kg/m<sup>2</sup></i> | 27.4 ± 5.1         | 27.2 ± 5.1   | -0.2 (-0.3, -0.2)  | <0.0001    |
| Waist circumference, <i>cm</i>           | 91.1 ± 13.0        | 90.1 ± 13.3  | -1.0 (-1.5, -0.6)  | <0.0001    |

Values are means ± SDs unless otherwise indicated.

\* Differences between post- and pre-intervention values, as determined by mixed models.
